# Supplementary material for: Identification of Hydroxyanthraquinones as Novel Inhibitors of Hepatitis C Virus NS3 Helicase
Source: Int J Mol Sci. 2015 Aug 7;16(8):18439–53. doi: 10.3390/ijms160818439 (PMC4581254; doi:10.3390/ijms160818439)
Supplement: Supplementary file 1 [file ijms-16-18439-s001.pdf]

## Supplementary Information

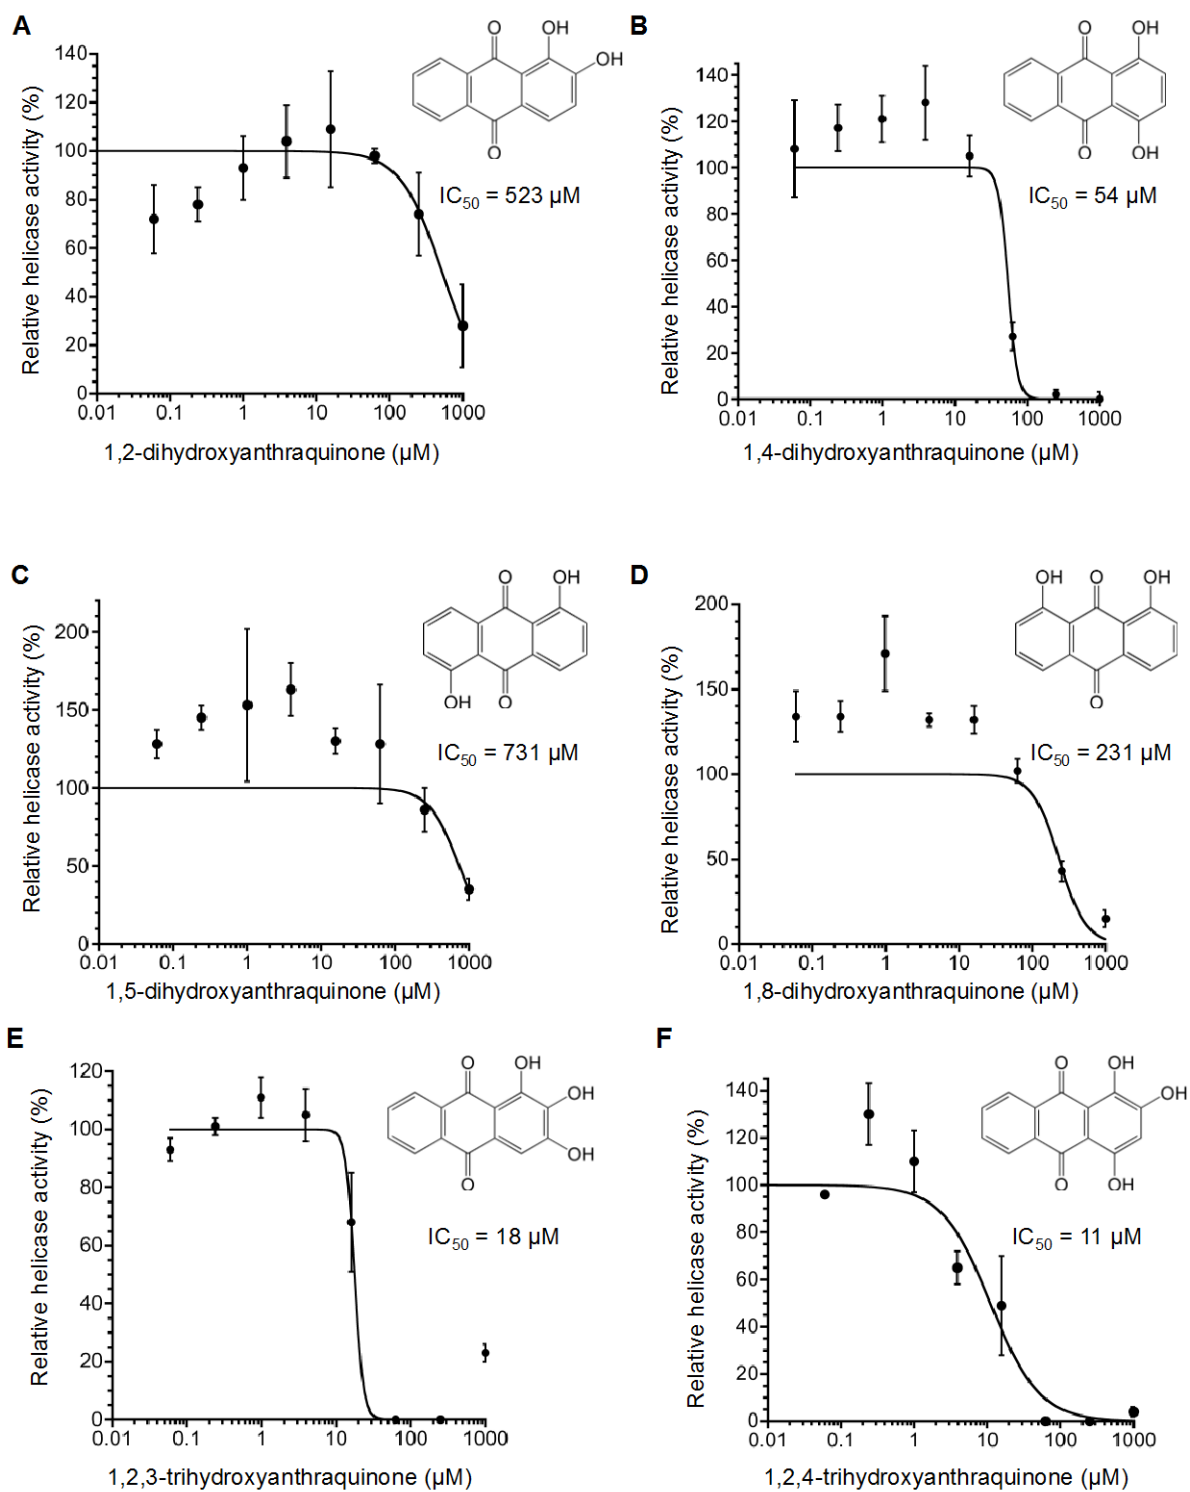

Figure S1. *Cont.*

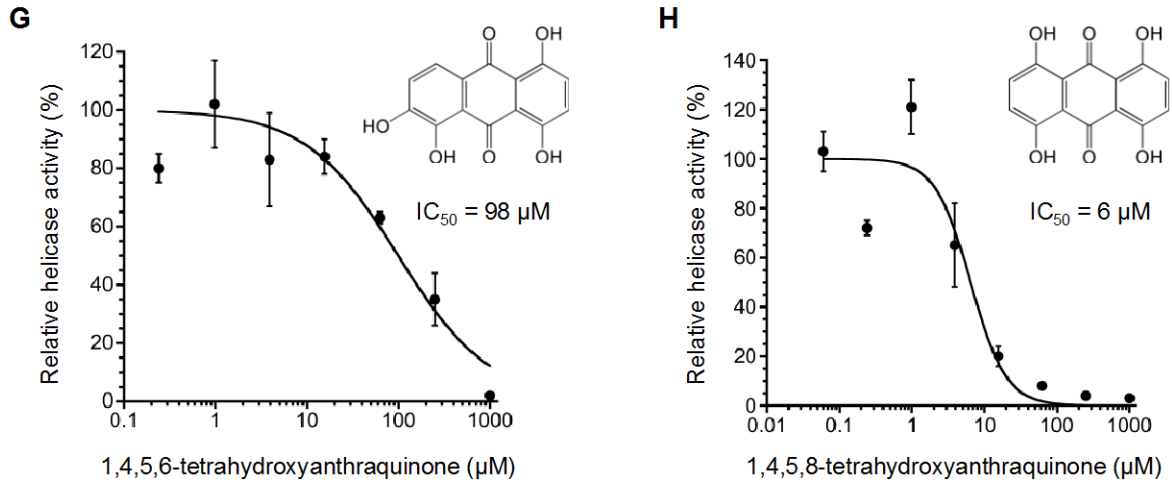

**Figure S1.** Inhibition curves of hydroxyanthraquinones (A–H) generated using a fluorescence helicase assay. NS3 helicase activities of samples containing inhibitor were calculated relative to those of control samples containing DMSO vehicle rather than inhibitor. The data are presented as mean  $\pm$  standard deviation of three replicates.

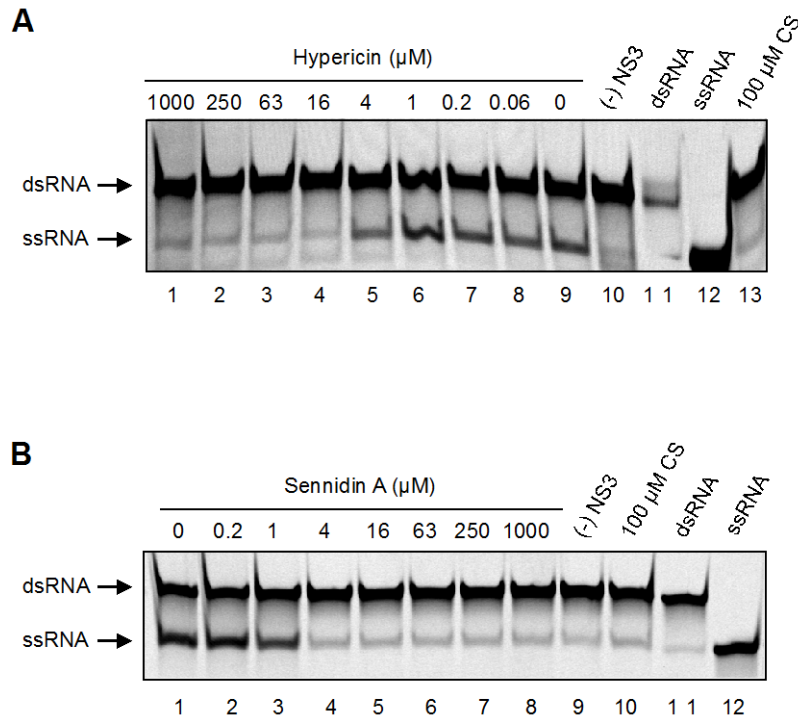

**Figure S2.** Gel images representing the inhibitory effects of hypericin (A) and sennidin A (B) in a gel-based helicase assay. The dsRNA was incubated with NS3 in the presence of increasing concentrations of inhibitor, as indicated above the gel images. Lane 10 in A and lane 9 in B show the control reaction in the absence of NS3. Cholesterol sulfate (CS) ( $\text{IC}_{50} = 1.7 \mu\text{M}$ ) was used at a final concentration of 100  $\mu\text{M}$  as positive control for NS3 helicase inhibition, as shown in lane 13 in A and lane 10 in B. Fluorescence-labeled dsRNA and ssRNA were applied to lanes 11 and 12, respectively, in A and B.
